# Supplementary material for: Antioxidant Capacities and Enzymatic Inhibitory Effects of Different Solvent Fractions and Major Flavones from Celery Seeds Produced in Different Geographic Areas in China
Source: MDPI journal article supplement (doi:10.3390/antiox11081542), 2022-08-09
Supplement: s1 [file s1]

**Table S1.** The detection wavelengths, retention time, regressive equations and correlation coefficient of six flavonoid glycosides.

| No. | Flavonoids               | Detection wavelengths | Retention time (min) | Regressive equations <sup>a</sup> | R <sup>2</sup> |
|-----|--------------------------|-----------------------|----------------------|-----------------------------------|----------------|
| 1   | Graveobioside A          | 270 nm                | 34.266               | y = 33.603x + 825.73              | 0.9999         |
| 2   | Luteolin-7-O-glucoside   | 270 nm                | 35.276               | y = 51.599x - 1251.8              | 0.9999         |
| 3   | Apiin                    | 270 nm                | 37.810               | y = 60.778x + 537.85              | 0.9999         |
| 4   | Graveobioside B          | 270 nm                | 38.394               | y = 39.306x + 2397.9              | 0.9999         |
| 5   | Apigenin-7-O-Glucoside   | 270 nm                | 39.106               | y = 84.896x + 41.423              | 0.9999         |
| 6   | Chrysoeriol-7-O-glucosid | 270 nm                | 39.952               | y = 46.219x + 278.37              | 0.9999         |

<sup>a</sup> The y value is the peak area of flavonoid glycosides and the x is the concentration of samples (ng/mL).

**Table S2.** Pearson's correlation coefficients (r) for the relationships between antioxidant assays, phenolic contents and flavonoid contents.

| Variables       | TPC      | TFC      | DPPH    | ABTS     | FRAP     | CUPRAC  |
|-----------------|----------|----------|---------|----------|----------|---------|
| TFC             | 0.922 ** |          |         |          |          |         |
| DPPH            | 0.621 *  | 0.462    |         |          |          |         |
| ABTS            | 0.796 ** | 0.609 *  | 0.602 * |          |          |         |
| FRAP            | 0.970 ** | 0.978 ** | 0.529 * | 0.695 *  |          |         |
| CUPRAC          | 0.983 ** | 0.958 ** | 0.571 * | 0.732 ** | 0.996 ** |         |
| Metal Chelating | 0.701 ** | 0.552 *  | 0.638 * | 0.488    | 0.602 *  | 0.639 * |

\*\* Significant correlation with p < 0.01; \* Significant correlation with p < 0.05.

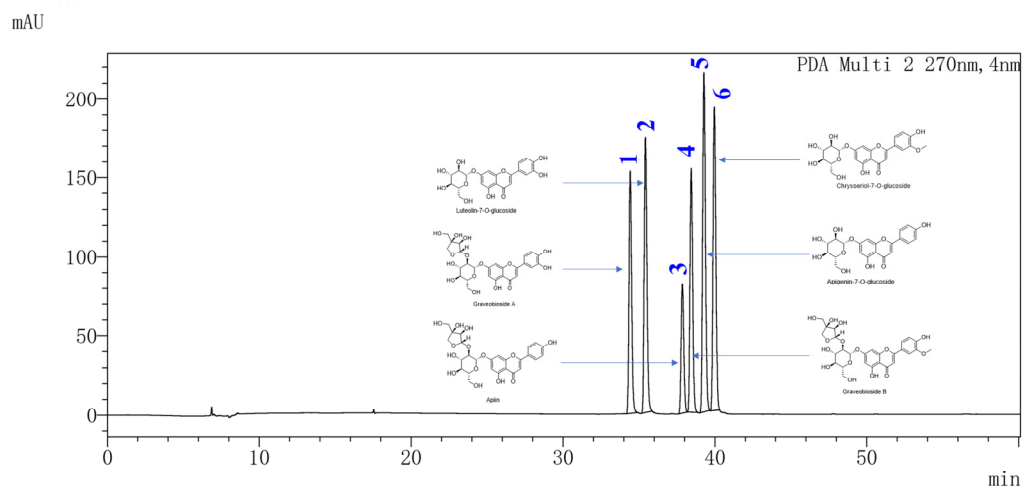

(a) Chromatograms of the standards.

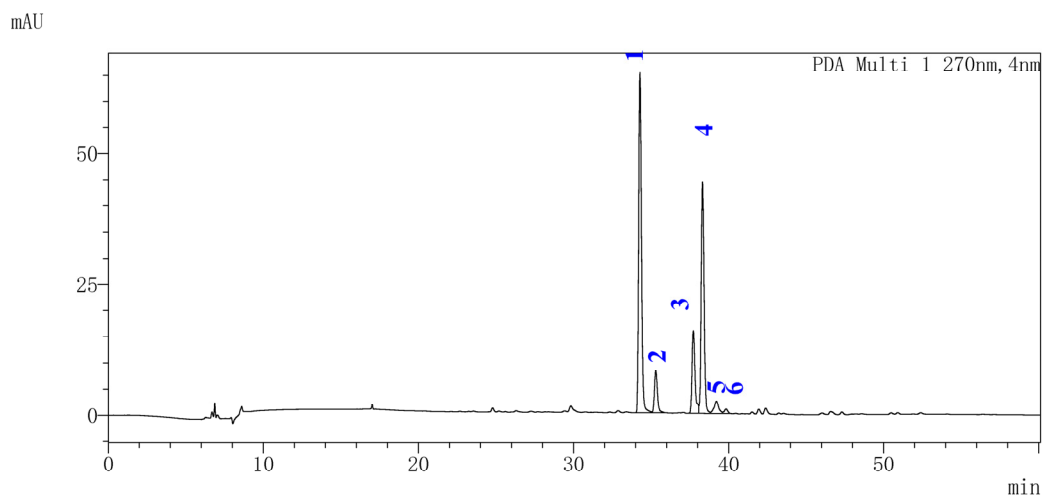

(b) Chromatograms of the n-butanol fractions from Shandong, China samples.

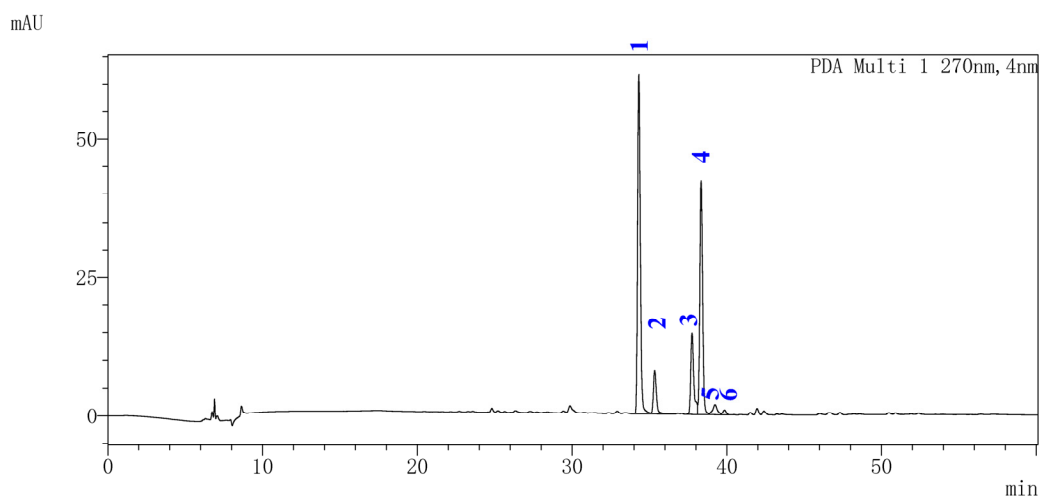

(c) Chromatograms of the n-butanol fractions from Guangxi, China samples.

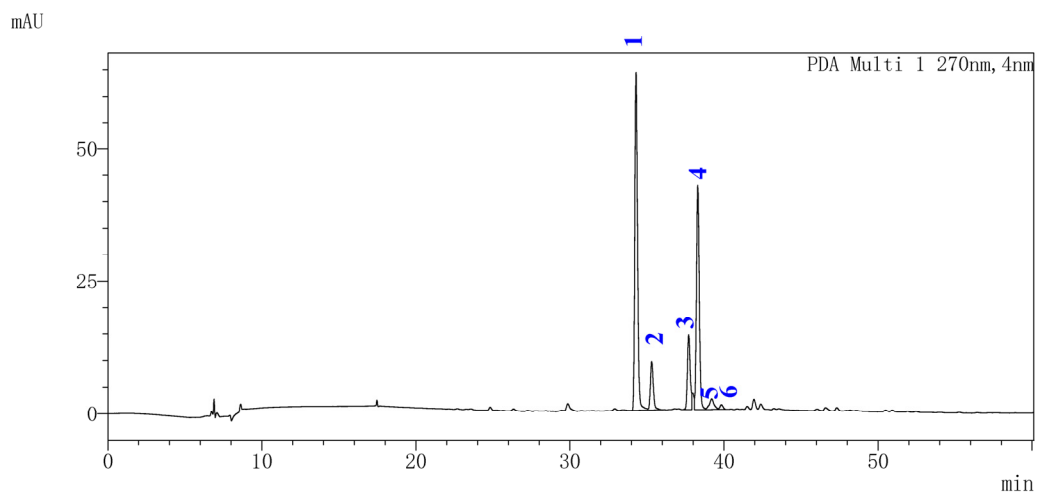

(d) Chromatograms of the n-butanol fractions from Northeast, China samples.

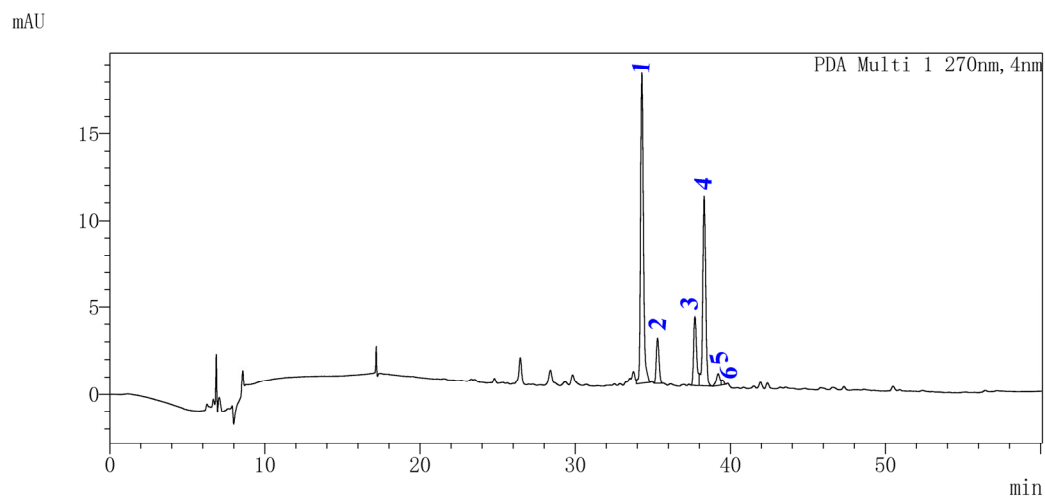

(e) Chromatograms of the n-butanol fractions from Jiangsu, China samples.

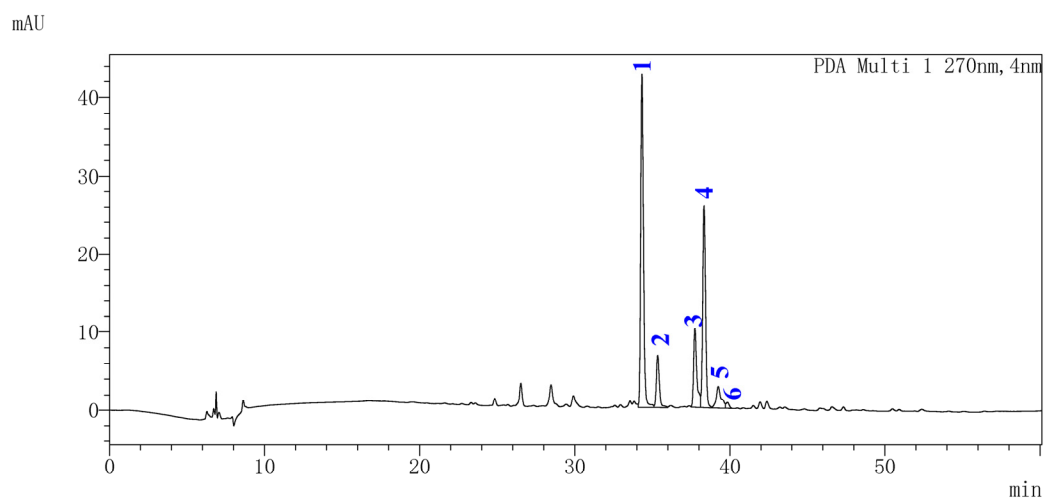

(f) Chromatograms of the n-butanol fractions from Hubei, China samples.

**Figure S1.** Chromatogram of the standards and n-butanol fractions from five samples.

1: Graveobioside A; 2: Luteolin-7-O-glucoside; 3: Apiin; 4: Graveobioside B; 5: Apigenin-7-O-glucoside; 6:

Chrysoeriol-7-O-glucoside.

**A. Gracvobioside A**

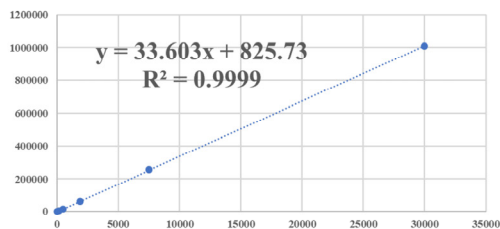

**B. Luteolin-7-O-glucoside**

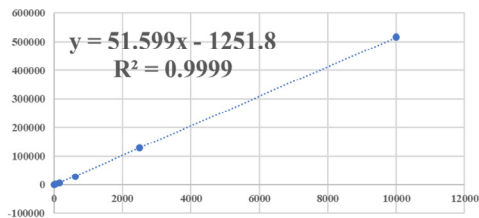

**C. Apiin**

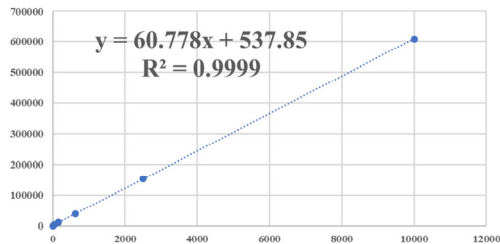

**D. Gracvobioside B**

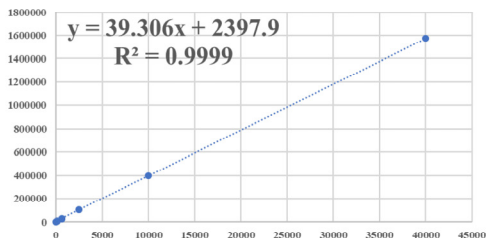

**E. Apigenin-7-O-Glucoside**

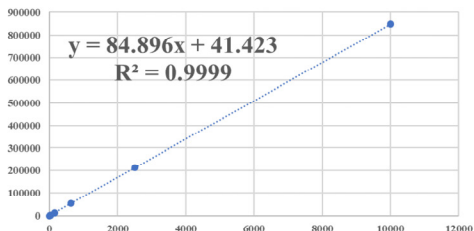

**F. Chrysoeriol-7-O-glucosid**

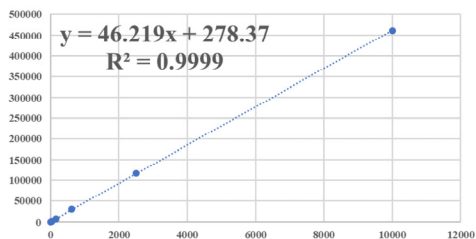

**G. TPC**

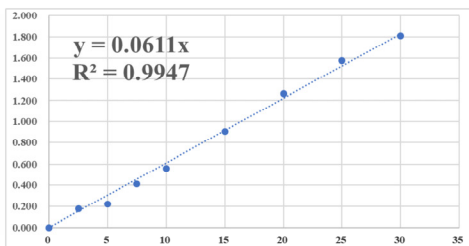

**H. TFC**

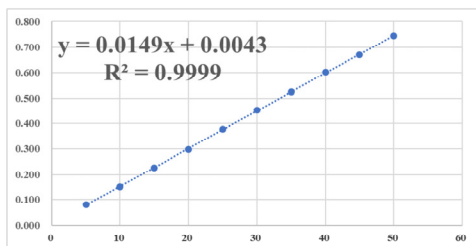

**I. FRAP**

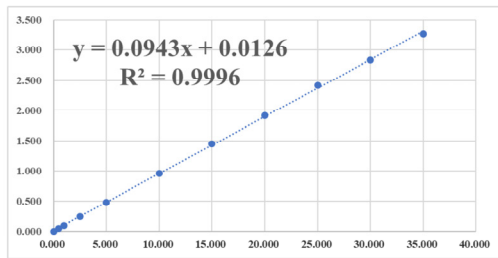

**J. CUPRAC**

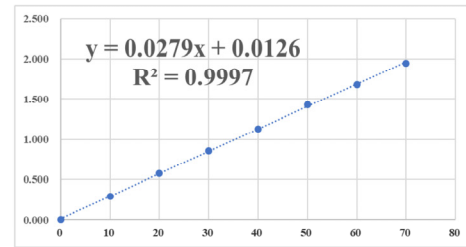

**K. Metal Chelating**

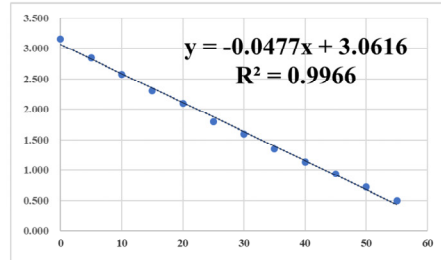

**Figure S2.** The standard curve of six flavonoid glycosides and TPC, TFC, FRAP, CUPRAC and metal chelating.
